# Supplementary material
Source: publisher site journal article supplement (https://www.dovepress.com/article/260640)
Supplement: Supplementary file 1 [file get_supplementary_file.php]

ORIGINAL RESEARCH

Montigaud et al

**Nebulised gadolinium-based nanoparticles for a multimodal approach: quantitative and qualitative lung distribution using magnetic resonance and scintigraphy imaging in isolated ventilated porcine lungs**

Yoann Montigaud1

Jérémie Pourchez1

Lara Leclerc1

Olivier Tillement2

Anthony Clotagatide3,4

Clémence Bal5

Noël Pinaud5

Nobuvasu Ichinose6

Bei Zhang7

Sophie Perinel3,4

François Lux2,8

Yannick Crémillieux5

Nathalie Prevot3,4

1Mines Saint-Etienne, Univ Lyon, Univ Jean Monnet, INSERM, U 1059 Sainbiose, Centre CIS, Saint-Etienne France; 2Institut Matière Lumière, Université de Lyon, Villeurbanne, France; 3INSERM U 1059 Sainbiose, Université Jean Monnet, Saint-Etienne, France; 4CHU Saint-Etienne, Saint-Etienne, France; 5Institut des Sciences Moléculaires, Université de Bordeaux, Bordeaux, France; 6Canon Medical Systems Corporation, Otawara, Japan; 7Canon Medical Systems Europe, Zoetermeer, Netherlands; 8Institut Universitaire de France (IUF), Paris, France.

Correspondence: Jérémie Pourchez

École Nationale Supérieure des Mines de Saint-Etienne

158 cours Fauriel, CS 62362

42023 Saint-Etienne Cedex 2. FRANCE.

Tel +33 4 77 42 01 80

Email [pourchez@emse.fr](mailto:pourchez@emse.fr)

# Material and methods

## Ex vivo respiratory model for preclinical aerosol studies


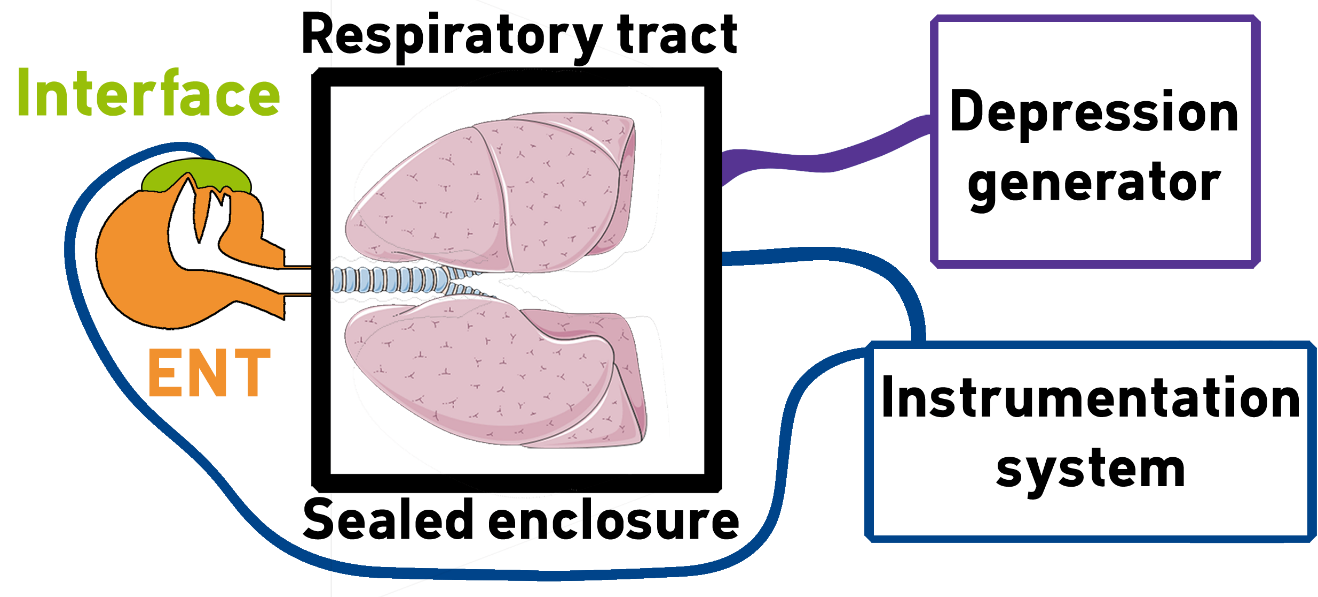


Figure 1 - Schematic representation of the ex vivo model. ENT: Ear-Nose-Thoat replica.


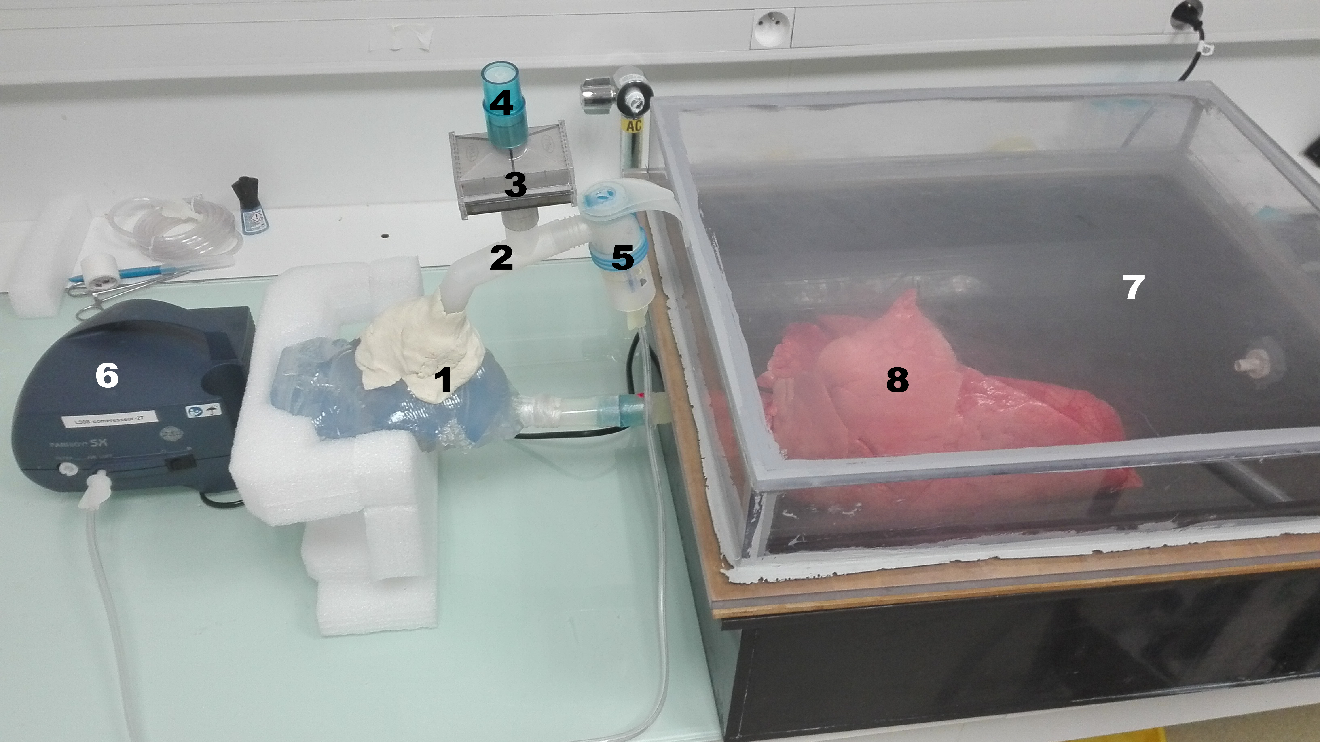


Figure 2 – Photographic image of the ex vivo model before the nebulization of SRP. 1: ENT. 2: Mouthpiece. 3: Expiratory filter. 4: One-way valve for exhalation. 5: Nebuliser. 6: Compressor. 7: Sealed enclosure. 8: Porcine respiratory tract.

The *ex vivo* respiratory model was composed of a replica of human upper airways connected to *ex vivo* porcine lungs. This original model was previously fully characterized and validated for preclinical regional aerosol studies1,2. The ENT replica of an adult, including laryngeal structures, was reconstructed from CT scans of a healthy subject and made by 3D-printing technology. The scans were provided by the University Hospital of Saint-Etienne. Before radiological examination, patients received an explicit note informing them that their data could be used for research. Afterwards, a written and informed consent is given by patients. This use of patients’ data was performed under supervision of the Ethic Committee of Saint-Etienne hospital. This ENT replica was assessed by endoscopy and CT scans and then validated by a senior radiologist. It was previously used for nasal and pulmonary assessment of aerosol deposition1–5. Porcine respiratory tracts were kindly supplied by a slaughterhouse (DespiViandes, La Talaudière France) and passed all quality controls requested in French regulation. They were used within 24 hours or frozen at −20 °C. Visual controls of wounds and sutures were achieved, and a bronchoscopy was performed to ensure the absence of significant obstruction of proximal bronchi. Lungs were placed in a sealed enclosure and ventilated using a depression generator (SuperDimension®, Covidien, Dusseldorf, Germany). Mean depression inside the enclosure was −9 kPa (−92 cmH2O). These relatively high negative pressures were two time the expected values, according to West6. *Ex vivo* lungs were not used during more than 8 hours. For all experiments, the model was set in supine position with following breathing pattern: 15 cycles per min, with 1.33 s inspiratory time and 2.66 s expiratory time leading to inspiratory/expiratory ratio of 1:2 inducing tidal volume about 500 mL and dynamic compliance about 90 cmH2O/mL as previously described3,7.

## Aerosol medical device

A nebuliser is a drug delivery device used to administer medication in the form of an aerosol inhaled into the lungs. The chosen medical device was a PARI LC SPRINT (PARI GmbH, Starnberg, Germany) jet nebuliser, with a corresponding compressor PARI TurboBOY® SX (PARI GmbH, Starnberg, Germany).

Unless otherwise specified, the reservoir of the nebuliser was always filled with 3 mL of solution/suspension before experiments. Nebulisation was conducted until complete atomization of the suspension.

## Particle aerodynamic size distribution

For all tracers (sodium fluoride [NaF], 99mtechnetium diethylene triamine pentaacetic acid [99mTc-DTPA] and AGuIX®), the assessment of the mass median aerodynamic diameter (MMAD) was performed in triplicate using a DLPI cascade impactor (Dekati Low Pressure Impactor). Operating at an airflow of 10 L.min−1, the DLPI allowed nebulised particles to be sorted into 12 aerodynamic size groups (from 30 nm to 10 µm). The nebuliser was connected to the cascade impactor *via* a metal United States Pharmacopeia (USP) like artificial throat (height 112 mm; width 42 mm; internal diameter 19 mm).

The NaF was used as a molecular chemical tracer according to European standard procedure focusing on aerosol medical devices (NF EN 13544-1). After the nebulisation process, the various elements (USP throat and each stage of the DLPI) were rinsed with 5 mL of deionized water. The NaF concentration of samples was assayed by electrochemical means (PerfectIONTM combined with a SevenGo proTM F− electrode, Mettler Toledo, France). Finally, the MMAD and the geometric standard deviation (GSD) of the nebulised particles were calculated8–11.

99mTc-DTPA was used as a molecular radiotracer. The deposited fraction on each DLPI stages was collected on an in-house impermeable plastic cover. This cover was then removed and the amount of 99mTc-DTPA quantified using Packard Cobra II auto-gamma counting system (Perkin-Elmer, Waltham, MA, USA). Finally, the activity median aerodynamic diameter (AMAD) and the geometric standard deviation (GSD) of the nebulised particles were calculated.

Finally, the AGuIX® were used as a nanotracer. The nebuliser was filled with 3 mL of AGuIX® suspension (300 µmol of Gd/mL in deionized water corresponding to 900 µmol of AGuIX®, or 47 175 ppm of Gd, initially introduced into the nebuliser tank). After nebulisation, the deposited fraction on each DLPI stages was collected using 1 mL of deionized water. The amount of Gd was then quantified by ICP-MS (NexIon 2000, PerkinElmer, Wellesley, MA). Preparation of samples for ICP-MS, was performed by placing samples in a polytetrafluoroethylene tube compatible with the microwave oven CEM Mars 5. A total of 10 mL of HNO3 69% were added, and after cooling down the samples were diluted in HNO3 1% to obtain a sample concentration of 1 g/L. Finally, the MMAD and the geometric standard deviation (GSD) of the nebulised particles were calculated.

## Aerosol output rate

The aerosol output delivered by the nebuliser (*i.e.* the emitted aerosol fraction) was assessed according to the NF EN 13544-1 European standard using a residual gravimetric method8,12. Briefly, the nebuliser was activated with 3 mL of solution/suspension containing the studied tracers (NaF, 99mTc-DTPA and AGuIX®), until atomization. The nebuliser is connected to 2 absolute electrostatic filters: one inhalation filter which is connected to a respiratory pump (PARI Compas II, PARI GmbH, 500 mL tidal volume with sinusoidal pattern; 15 cycles/min; I/E of 1:1) and one expiratory filter with a one-way valve. The mass of the emitted aerosol fraction was measured on the filter before and after nebulisation. Results are given as proportion of the given tracer in the inhalable filter *versus* the initial quantity of tracer introduced in the nebuliser.

## Regional aerosol deposition assessed by gamma-camera imaging

Nebulised radionuclides used for scintigraphy imaging were 99mTc-DTPA as molecular radiotracer and 111indium chloride (111In) chelated on the AGuIX® nanoparticles as a nanoparticular radiotracer. The nebulisation was performed with 100 MBq/3 mL of 99mTc-DTPA and 60 MBq/3 mL of 111In-AGuIX® suspension. The chelation of 111In on AGuIX® was performed following the protocol developed by Morlieras *et al.*13. The nanoparticles were suspended in milliQ water to reach the concentration of 100 mg/mL, according to the manufacturer’s recommendation. Then, 200 µL of AGuIX® suspension were placed in a scintillation vial with 400 µL of 111In and citrate buffer (pH 5; 100mM) *qs* for 10 mL. The mixture was put under magnetic stirring at 50°C for 15 minutes. Then purification was achieved with Vivacon® centrifuge filter 2kDA MWCO (Sartorius, Göttingen, Germany) at 14,000 g for 15 minutes. The nebuliser was connected to the ENT by a mouthpiece, sealing was conducted to avoid any loss of generated aerosol. To avoid exposure due to exhaled aerosol, an expiratory filter was positioned after a one-way valve.

The gamma-camera imaging was realized as previously described1,3. 2D scintigraphies were conducted on 3 respiratory tracts for each radionuclide with a variable angle dual detector Single Photon Emission Computed Tomography/Computed Tomography (SPECT-CT, SYMBIA T2; Siemens, Knoxville, TN). For the 111In-AGuIX nanoparticles, the gamma camera was equipped with a medium-energy parallel-hole collimator with 111In photopeaks (172 and 245 keV) set for 20% windows is used to acquire planar imaging with the following parameters: 256x256 matrix, 180 s acquisition time per image. FOV = 53.3 x 38.7 cm; pixel 2.4x 2.4 mm. Spatial resolution at 10cm : 12.5 mm. For the 99mtechnetium-DTPA, the gamma camera was equipped with a low-energy, high-resolution collimator (FWHM 8.3 mm at 10 cm); tested weekly for uniformity (UFOV 533 mm× 387 mm, CFOV 400 mm× 290 mm).

The inhalation experiments needed to assess the initial radioactive dose in the nebuliser, which was calculated from the difference of activity between the full and empty syringe with 3-min anterior/posterior scintigraphic images. After inhalation of the aerosol, each component of the system was imaged with 3-min anterior/posterior exposition: nebuliser (with dead volume), expiratory filter, ENT replica and respiratory tract. The count of each part was determined with corrections for background radiation, radioactivity decay and tissue attenuation (correction factor calculated for each component). Results were expressed in terms of the nominal dose of radioactivity loaded in the nebuliser.

## Regional aerosol deposition assessed by MRI

MRI contrast agents used were gadoterate meglumine (Clariscan® Gé, GE Healthcare) as a molecular tracer and AGuIX® nanoparticles as nanoparticular (NP) tracer. The chosen concentration of each tracer was 300 mM equivalent gadolinium.

For the MRI acquisitions, the protocol allowing the imaging of nebulised AGuIX® in isolated porcine lungs was previously described7. The lungs within a specific non-magnetic sealed enclosure were positioned inside a 3 Tesla whole body magnet (Vantage Galan 3T ZGO, Canon Medical Systems Corporation, Japan). MR images were acquired using a T1-weighted 3D UTE (Ultra short Echo Time) MRI sequence with the following acquisition parameters: TR=3.7 ms, TE=96 μs, number of radial trajectory=56064, 1 average, total acquisition time=3.5 min, FOV=50 cm, 1mm isotropic resolution. Detailed information about the MR imaging protocol are available in the paper from Crémillieux *et al.*7.

The signal enhancement (SE) was defined as:

(1)

where SNRaerosol and SNRbaseline correspond to the signal-to-noise ratio (SNR) measured respectively in the nebulised lung and in the gadolinium-free lung. SNRs were measured in regions of interest (ROI) avoiding visible airways with typical surface area of 20 cm². The UTE acquisitions acquired at four different flip angles were used for computing the longitudinal relaxation time T17. The T1 value was then used to estimate the concentration, C (mM), of Gd3+ ion in the lungs as follows:

(2)14

where T1pre and T1post are the longitudinal relaxation times with and without nebulisation of Gd-based aerosol and r1 is the longitudinal relaxivity induced by the gadolinium ion and equal to 8.9 mM-1.s-1 and 3.9 mM-1.s-1 per Gd3+ ion at 3T and room temperature for AGuIX® nanoparticle and gadoterate meglumine (DOTA), respectively. The measurements of SNR values in region of interest (ROI) and the generation of maximum intensity of projection (MIP) were performed using OsiriX (Geneva, Switzerland). The computing of T1 values was realized using open-source SciLab software (ESI, Paris, France).

Two pieces (1.5 g each) per lobe of two lungs nebulised with NP-aerosol and DOTA-aerosol were sampled from the lung parenchyma and used for the quantification of gadolinium concentration using ICP-MS (NexIon 2000, PerkinElmer, Wellesley, MA, USA). Following harvesting, the pieces were placed immediately in a PTFE tube compatible with the microwave oven CEM Mars 5. Ten millimetres of HNO3 69% were added, and after cooling down, the samples were diluted in HNO3 1% in order to obtain a concentration of tissue of 1 g/L.

## Statistical analyses

Statistical analyses were performed using GraphPad Prism (GraphPad Software Inc., San Diego, CA, USA). For the aerosol size and output determination, a one-way ANOVA with Tukey’s *post-hoc* multiple comparison test was performed. For the quantitative assessment of regional radioaerosol deposition in the *ex vivo* model, a two-way ANOVA with Sidak’s *post-hoc* multiple comparison test was used. For MRI quantitative assessment, multiple t-tests were used with

statistical significance determined using the Holm-Sidak method.

For all tests, significance was fixed at a 5% probability level. The data are presented as mean value ± standard deviation (SD).
